# Supplementary material for: Unsaturated fatty-acid based HPLC fingerprints in combination with quantitative analysis of multi-components by single-marker for the classification of Rana chensinensis ovum
Source: Royal Society of Chemistry journal article supplement (doi:10.1039/d2nj00379a), 2022-01-01
Supplement: d2nj00379a1.pdf [file d2nj00379a1.pdf]

### *Supplementary Information*

## **Unsaturated fatty-acids based HPLC fingerprint in combination with quantitative analysis of multi-components by single-marker for classification of *Rana chensinensis* ovum**

Changli Zhang,<sup>a</sup> Nan Li,<sup>a</sup> Zhongyao Wang,<sup>a</sup> Shihan Wang,<sup>b</sup> Zhihan Wang,<sup>a</sup> Xuanrui Fan,<sup>a</sup> Xinxin Xu,<sup>a</sup> Yue Zhou<sup>a</sup> and Yongsheng Wang<sup>a,\*</sup>

*a. School of Pharmaceutical Sciences, Jilin University, Changchun 130021, China*

*b. College of Chinese Medicinal Materials, Jilin Agricultural University, Changchun 130118, China*

\* Correspondence: [wys@jlu.edu.cn](mailto:wys@jlu.edu.cn)

**Table S1.** UPLC-Q/TOF-MS analysis of seven compounds in the RCO

**Table S2.** The precision, stability, repeatability and accuracy of the HPLC analysis method for RCO

**Table S3.** The similarity data matrix of the 11 common peaks fingerprint

**Table S4.** The similarity data matrix of the seven identified UFAs fingerprint

**Table S5.** The mean values of RCFs based on different influencing factors

**Fig. S1** Effect of different influencing factors on the robustness of RCFs.

**Table S1.** UPLC-Q/TOF-MS analysis of seven compounds in RCO

| Compound | MS Fragmentation                                                                                               | Molecular Formula                              | Proposed Compound |
|----------|----------------------------------------------------------------------------------------------------------------|------------------------------------------------|-------------------|
| 1        | 301.2160 [M-H] <sup>-</sup> , 257.2265 [M-COOH] <sup>-</sup>                                                   | C <sub>20</sub> H <sub>30</sub> O <sub>2</sub> | EPA               |
| 2        | 277.2155 [M-H] <sup>-</sup> , 259.2408 [M-COOH] <sup>-</sup>                                                   | C <sub>18</sub> H <sub>30</sub> O <sub>2</sub> | ALA               |
| 3        | 327.2336 [M-H] <sup>-</sup> , 283.2520 [M-COOH] <sup>-</sup>                                                   | C <sub>22</sub> H <sub>32</sub> O <sub>2</sub> | DHA               |
| 4        | 303.2335 [M-H] <sup>-</sup> , 285.2548<br>[M-H-H <sub>2</sub> O] <sup>-</sup> , 259.2430 [M-COOH] <sup>-</sup> | C <sub>20</sub> H <sub>32</sub> O <sub>2</sub> | ARA               |
| 5        | 329.2500 [M-H] <sup>-</sup> , 285.2607 [M-COOH] <sup>-</sup>                                                   | C <sub>22</sub> H <sub>34</sub> O <sub>2</sub> | DPA               |
| 6        | 279.2343 [M-H] <sup>-</sup> , 261.2255 [M-COOH] <sup>-</sup>                                                   | C <sub>18</sub> H <sub>32</sub> O <sub>2</sub> | LA                |
| 7        | 281.2483 [M-H] <sup>-</sup> , 263.1652 [M-H-H <sub>2</sub> O] <sup>-</sup>                                     | C <sub>18</sub> H <sub>34</sub> O <sub>2</sub> | OA                |

**Table S2.** The precision, stability, repeatability and accuracy of the HPLC analysis method for RCO

| UFAs | Precision RSD% | Stability<br>RSD% | Repeatability RSD% | Recovery |      |
|------|----------------|-------------------|--------------------|----------|------|
|      |                |                   |                    | Mean%    | RSD% |
| EPA  | 0.68           | 1.85              | 3.08               | 100.93   | 2.79 |
| ALA  | 0.44           | 1.87              | 1.97               | 104.75   | 4.99 |
| DHA  | 0.29           | 1.89              | 3.24               | 96.20    | 5.20 |
| ARA  | 0.42           | 1.91              | 3.17               | 104.68   | 3.07 |
| DPA  | 0.92           | 1.99              | 3.10               | 96.62    | 5.38 |
| LA   | 0.25           | 1.73              | 3.08               | 100.31   | 2.61 |
| OA   | 0.21           | 1.96              | 3.07               | 104.47   | 4.22 |

**Table S3.** The similarity data matrix of the 11 common peaks fingerprint

| NO.   | S1    | S2    | S3    | S4    | S5    | S6    | S7    | S8    | S9    | S10   | S11   | S12   | S13   | S14   | S15   | S16   | S17   | S18   | S19   | R(11) |
|-------|-------|-------|-------|-------|-------|-------|-------|-------|-------|-------|-------|-------|-------|-------|-------|-------|-------|-------|-------|-------|
| S1    | 1     | 0.950 | 0.982 | 0.974 | 0.978 | 0.969 | 0.971 | 0.991 | 0.971 | 0.96  | 0.944 | 0.948 | 0.949 | 0.975 | 0.938 | 0.948 | 0.972 | 0.943 | 0.912 | 0.970 |
| S2    | 0.950 | 1     | 0.987 | 0.994 | 0.988 | 0.994 | 0.991 | 0.979 | 0.989 | 0.979 | 0.976 | 0.980 | 0.988 | 0.982 | 0.975 | 0.983 | 0.984 | 0.978 | 0.981 | 0.991 |
| S3    | 0.982 | 0.987 | 1     | 0.995 | 0.992 | 0.993 | 0.991 | 0.996 | 0.995 | 0.987 | 0.973 | 0.974 | 0.978 | 0.984 | 0.972 | 0.975 | 0.993 | 0.967 | 0.958 | 0.992 |
| S4    | 0.974 | 0.994 | 0.995 | 1     | 0.995 | 0.999 | 0.997 | 0.994 | 0.996 | 0.989 | 0.983 | 0.986 | 0.987 | 0.992 | 0.979 | 0.986 | 0.993 | 0.979 | 0.976 | 0.997 |
| S5    | 0.978 | 0.988 | 0.992 | 0.995 | 1     | 0.995 | 0.997 | 0.996 | 0.993 | 0.980 | 0.980 | 0.982 | 0.989 | 0.997 | 0.977 | 0.983 | 0.988 | 0.961 | 0.967 | 0.995 |
| S6    | 0.969 | 0.994 | 0.993 | 0.999 | 0.995 | 1     | 0.999 | 0.991 | 0.993 | 0.989 | 0.986 | 0.990 | 0.988 | 0.993 | 0.982 | 0.989 | 0.992 | 0.976 | 0.980 | 0.998 |
| S7    | 0.971 | 0.991 | 0.991 | 0.997 | 0.997 | 0.999 | 1     | 0.993 | 0.994 | 0.990 | 0.991 | 0.993 | 0.991 | 0.997 | 0.986 | 0.993 | 0.994 | 0.966 | 0.981 | 0.999 |
| S8    | 0.991 | 0.979 | 0.996 | 0.994 | 0.996 | 0.991 | 0.993 | 1     | 0.993 | 0.982 | 0.974 | 0.975 | 0.978 | 0.992 | 0.970 | 0.975 | 0.990 | 0.960 | 0.953 | 0.992 |
| S9    | 0.971 | 0.989 | 0.995 | 0.996 | 0.993 | 0.993 | 0.994 | 0.993 | 1     | 0.99  | 0.984 | 0.982 | 0.989 | 0.987 | 0.986 | 0.984 | 0.995 | 0.961 | 0.972 | 0.996 |
| S10   | 0.960 | 0.979 | 0.987 | 0.989 | 0.98  | 0.989 | 0.99  | 0.982 | 0.99  | 1     | 0.991 | 0.991 | 0.980 | 0.978 | 0.99  | 0.988 | 0.997 | 0.957 | 0.980 | 0.993 |
| S11   | 0.944 | 0.976 | 0.973 | 0.983 | 0.98  | 0.986 | 0.991 | 0.974 | 0.984 | 0.991 | 1     | 0.998 | 0.990 | 0.985 | 0.998 | 0.997 | 0.991 | 0.941 | 0.991 | 0.993 |
| S12   | 0.948 | 0.980 | 0.974 | 0.986 | 0.982 | 0.99  | 0.993 | 0.975 | 0.982 | 0.991 | 0.998 | 1     | 0.989 | 0.987 | 0.993 | 0.998 | 0.990 | 0.952 | 0.992 | 0.994 |
| S13   | 0.949 | 0.988 | 0.978 | 0.987 | 0.989 | 0.988 | 0.991 | 0.978 | 0.989 | 0.980 | 0.990 | 0.989 | 1     | 0.989 | 0.992 | 0.994 | 0.988 | 0.947 | 0.986 | 0.993 |
| S14   | 0.975 | 0.982 | 0.984 | 0.992 | 0.997 | 0.993 | 0.997 | 0.992 | 0.987 | 0.978 | 0.985 | 0.987 | 0.989 | 1     | 0.978 | 0.987 | 0.986 | 0.955 | 0.970 | 0.994 |
| S15   | 0.938 | 0.975 | 0.972 | 0.979 | 0.977 | 0.982 | 0.986 | 0.970 | 0.986 | 0.990 | 0.998 | 0.993 | 0.992 | 0.978 | 1     | 0.994 | 0.991 | 0.932 | 0.989 | 0.990 |
| S16   | 0.948 | 0.983 | 0.975 | 0.986 | 0.983 | 0.989 | 0.993 | 0.975 | 0.984 | 0.988 | 0.997 | 0.998 | 0.994 | 0.987 | 0.994 | 1     | 0.991 | 0.949 | 0.992 | 0.994 |
| S17   | 0.972 | 0.984 | 0.993 | 0.993 | 0.988 | 0.992 | 0.994 | 0.990 | 0.995 | 0.997 | 0.991 | 0.990 | 0.988 | 0.986 | 0.991 | 0.991 | 1     | 0.957 | 0.977 | 0.997 |
| S18   | 0.943 | 0.978 | 0.967 | 0.979 | 0.961 | 0.976 | 0.966 | 0.960 | 0.961 | 0.957 | 0.941 | 0.952 | 0.947 | 0.955 | 0.932 | 0.949 | 0.957 | 1     | 0.949 | 0.966 |
| S19   | 0.912 | 0.981 | 0.958 | 0.976 | 0.967 | 0.980 | 0.981 | 0.953 | 0.972 | 0.980 | 0.991 | 0.992 | 0.986 | 0.970 | 0.989 | 0.992 | 0.977 | 0.949 | 1     | 0.983 |
| R(11) | 0.970 | 0.991 | 0.992 | 0.997 | 0.995 | 0.998 | 0.999 | 0.992 | 0.996 | 0.993 | 0.993 | 0.994 | 0.993 | 0.994 | 0.990 | 0.994 | 0.997 | 0.966 | 0.983 | 1     |

**Table S4.** The similarity data matrix of the seven identified UFAs fingerprint

| NO.  | S1    | S2    | S3    | S4    | S5    | S6    | S7    | S8    | S9    | S10   | S11   | S12   | S13   | S14   | S15   | S16   | S17   | S18   | S19   | R(7)  |
|------|-------|-------|-------|-------|-------|-------|-------|-------|-------|-------|-------|-------|-------|-------|-------|-------|-------|-------|-------|-------|
| S1   | 1.000 | 0.958 | 0.983 | 0.977 | 0.980 | 0.974 | 0.975 | 0.991 | 0.970 | 0.960 | 0.945 | 0.952 | 0.952 | 0.980 | 0.937 | 0.953 | 0.971 | 0.962 | 0.920 | 0.972 |
| S2   | 0.958 | 1.000 | 0.994 | 0.995 | 0.990 | 0.995 | 0.992 | 0.985 | 0.997 | 0.988 | 0.979 | 0.980 | 0.989 | 0.982 | 0.982 | 0.983 | 0.992 | 0.979 | 0.980 | 0.993 |
| S3   | 0.983 | 0.994 | 1.000 | 0.997 | 0.994 | 0.997 | 0.994 | 0.996 | 0.995 | 0.987 | 0.973 | 0.977 | 0.980 | 0.988 | 0.972 | 0.979 | 0.993 | 0.984 | 0.965 | 0.994 |
| S4   | 0.977 | 0.995 | 0.997 | 1.000 | 0.995 | 0.999 | 0.997 | 0.995 | 0.999 | 0.992 | 0.983 | 0.985 | 0.987 | 0.992 | 0.982 | 0.986 | 0.995 | 0.985 | 0.977 | 0.998 |
| S5   | 0.980 | 0.990 | 0.994 | 0.995 | 1.000 | 0.996 | 0.997 | 0.997 | 0.996 | 0.982 | 0.980 | 0.982 | 0.989 | 0.998 | 0.978 | 0.983 | 0.990 | 0.967 | 0.968 | 0.995 |
| S6   | 0.974 | 0.995 | 0.997 | 0.999 | 0.996 | 1.000 | 0.999 | 0.995 | 0.998 | 0.994 | 0.987 | 0.990 | 0.988 | 0.993 | 0.985 | 0.989 | 0.997 | 0.980 | 0.980 | 0.999 |
| S7   | 0.975 | 0.992 | 0.994 | 0.997 | 0.997 | 0.999 | 1.000 | 0.995 | 0.997 | 0.994 | 0.991 | 0.993 | 0.991 | 0.997 | 0.989 | 0.993 | 0.997 | 0.971 | 0.982 | 0.999 |
| S8   | 0.991 | 0.985 | 0.996 | 0.995 | 0.997 | 0.995 | 0.995 | 1.000 | 0.993 | 0.982 | 0.974 | 0.978 | 0.980 | 0.996 | 0.970 | 0.978 | 0.990 | 0.975 | 0.958 | 0.993 |
| S9   | 0.970 | 0.997 | 0.995 | 0.999 | 0.996 | 0.998 | 0.997 | 0.993 | 1.000 | 0.990 | 0.986 | 0.987 | 0.993 | 0.992 | 0.986 | 0.988 | 0.995 | 0.980 | 0.981 | 0.998 |
| S10  | 0.960 | 0.988 | 0.987 | 0.992 | 0.982 | 0.994 | 0.994 | 0.982 | 0.990 | 1.000 | 0.993 | 0.995 | 0.983 | 0.983 | 0.990 | 0.993 | 0.997 | 0.975 | 0.989 | 0.995 |
| S11  | 0.945 | 0.979 | 0.973 | 0.983 | 0.980 | 0.987 | 0.991 | 0.974 | 0.986 | 0.993 | 1.000 | 0.999 | 0.991 | 0.986 | 0.999 | 0.998 | 0.992 | 0.949 | 0.995 | 0.992 |
| S12  | 0.952 | 0.980 | 0.977 | 0.985 | 0.982 | 0.990 | 0.993 | 0.978 | 0.987 | 0.995 | 0.999 | 1.000 | 0.989 | 0.987 | 0.997 | 0.998 | 0.994 | 0.955 | 0.993 | 0.994 |
| S13  | 0.952 | 0.989 | 0.980 | 0.987 | 0.989 | 0.988 | 0.991 | 0.980 | 0.993 | 0.983 | 0.991 | 0.989 | 1.000 | 0.989 | 0.994 | 0.994 | 0.991 | 0.952 | 0.988 | 0.993 |
| S14  | 0.980 | 0.982 | 0.988 | 0.992 | 0.998 | 0.993 | 0.997 | 0.996 | 0.992 | 0.983 | 0.986 | 0.987 | 0.989 | 1.000 | 0.982 | 0.987 | 0.990 | 0.958 | 0.970 | 0.995 |
| S15  | 0.937 | 0.982 | 0.972 | 0.982 | 0.978 | 0.985 | 0.989 | 0.970 | 0.986 | 0.990 | 0.999 | 0.997 | 0.994 | 0.982 | 1.000 | 0.998 | 0.991 | 0.948 | 0.997 | 0.991 |
| S16  | 0.953 | 0.983 | 0.979 | 0.986 | 0.983 | 0.989 | 0.993 | 0.978 | 0.988 | 0.993 | 0.998 | 0.998 | 0.994 | 0.987 | 0.998 | 1.000 | 0.995 | 0.952 | 0.993 | 0.995 |
| S17  | 0.971 | 0.992 | 0.993 | 0.995 | 0.990 | 0.997 | 0.997 | 0.990 | 0.995 | 0.997 | 0.992 | 0.994 | 0.991 | 0.990 | 0.991 | 0.995 | 1.000 | 0.974 | 0.985 | 0.999 |
| S18  | 0.962 | 0.979 | 0.984 | 0.985 | 0.967 | 0.980 | 0.971 | 0.975 | 0.980 | 0.975 | 0.949 | 0.955 | 0.952 | 0.958 | 0.948 | 0.952 | 0.974 | 1.000 | 0.948 | 0.974 |
| S19  | 0.920 | 0.980 | 0.965 | 0.977 | 0.968 | 0.980 | 0.982 | 0.958 | 0.981 | 0.989 | 0.995 | 0.993 | 0.988 | 0.970 | 0.997 | 0.993 | 0.985 | 0.948 | 1.000 | 0.985 |
| R(7) | 0.972 | 0.993 | 0.994 | 0.998 | 0.995 | 0.999 | 0.999 | 0.993 | 0.998 | 0.995 | 0.992 | 0.994 | 0.993 | 0.995 | 0.991 | 0.995 | 0.999 | 0.974 | 0.985 | 1.000 |

**Table S5.** The mean values of RCFs based on different influencing factors

| Factor                            | $F_{ALA/EPA}$ | $F_{ALA/DHA}$ | $F_{ALA/ARA}$ | $F_{ALA/DPA}$ | $F_{ALA/LA}$ | $F_{ALA/OA}$ |
|-----------------------------------|---------------|---------------|---------------|---------------|--------------|--------------|
| Column temperature                | 1.7418        | 2.3176        | 1.6621        | 1.7626        | 0.7012       | 0.1522       |
| Flow rate                         | 1.7478        | 2.3129        | 1.6585        | 1.7601        | 0.6989       | 0.1510       |
| HPLC instrument system and column | 1.7339        | 2.2903        | 1.6239        | 1.7685        | 0.7010       | 0.1581       |

$F_{ALA/i}$ : the relative correction factor (RCF) of the internal reference ALA relative to the  $UFA_i$  to be measured (i= EPA, DHA, ARA, DPA, LA, and OA).

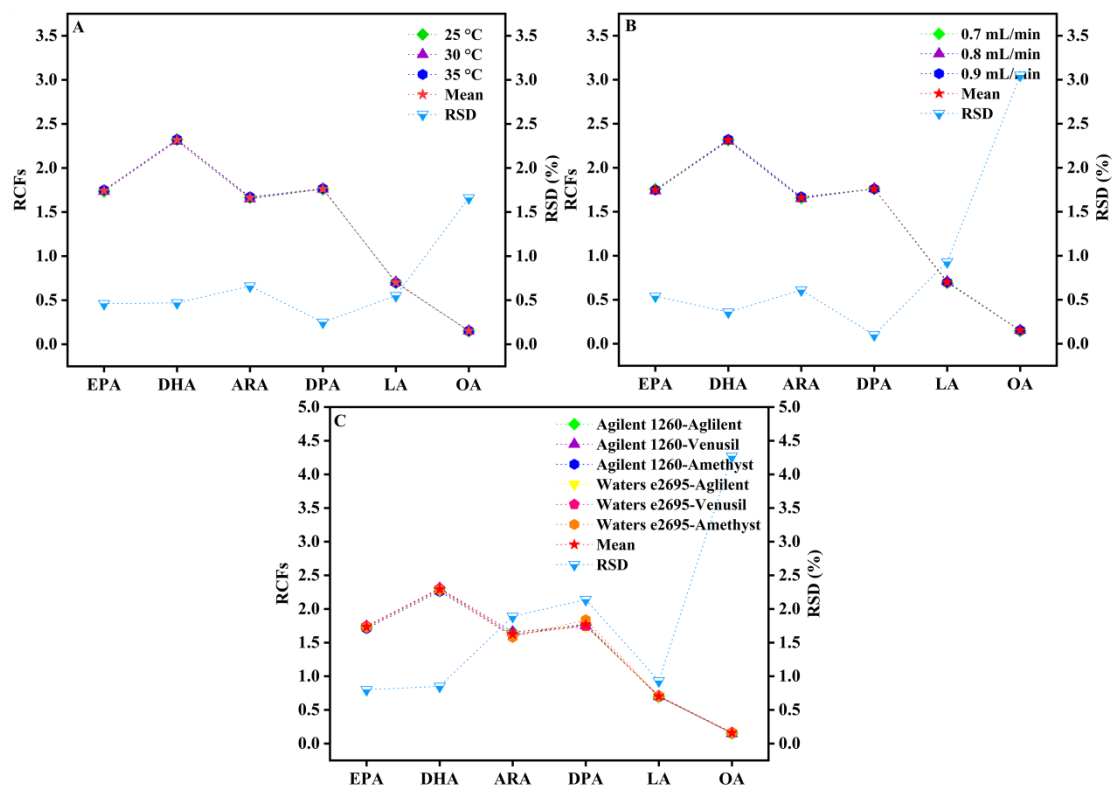

**Fig. S1** Effect of different influencing factors on the robustness of RCFs (A) column temperature, (B) flow rate, (C) HPLC instrument system and column.
